# Supplementary material for: Automated Laser-Fiber Coupling Module for Optical-Resolution Photoacoustic Microscopy
Source: MDPI journal article supplement (doi:10.3390/s23146643), 2023-07-24
Supplement: s1 [file s1]

**Supplementary information for:**

## **Automated Laser-Fiber Coupling Module for Optical-Resolution Photoacoustic Microscopy**

Seongyi Han<sup>1</sup>, Hyunjun Kye<sup>1</sup>, Chang-Seok Kim<sup>1</sup>, Tae-Kyong Kim<sup>2</sup>, Jinwoo Yoo<sup>3</sup>, and Jeesu Kim<sup>1,\*</sup>

<sup>1</sup> Departments of Cogno-Mechatronics Engineering and Optics & Mechatronics Engineering, Pusan National University, Busan 46241, Republic of Korea.

<sup>2</sup> Department of Electronic Engineering, Gachon University, Seongnam 13120, Republic of Korea.

<sup>3</sup> Department of Automobile and IT Convergence, Kookmin University, Seoul 02707, Republic of Korea.

**\*Corresponding author:** jeesukim@pusan.ac.kr

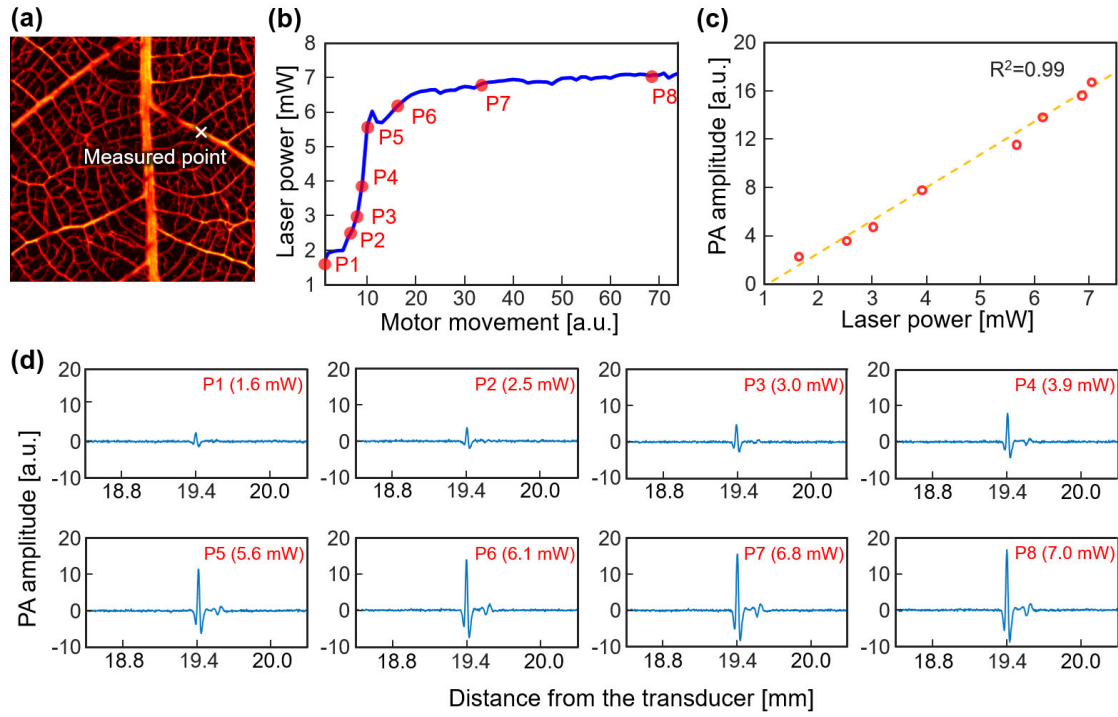

**Figure S1.** Photoacoustic amplitudes at various laser power. (a) Measured point on the PA image of a leaf-skeleton phantom. Depth-wise A-line signals were recorded with various laser power. (b) Laser power during the automated laser-power coupling process. (c) Proportional correlation between the delivered laser power and the measured PA amplitude. (d) PA signal at each measured point. PA, photoacoustic; P1–P8, measured points.

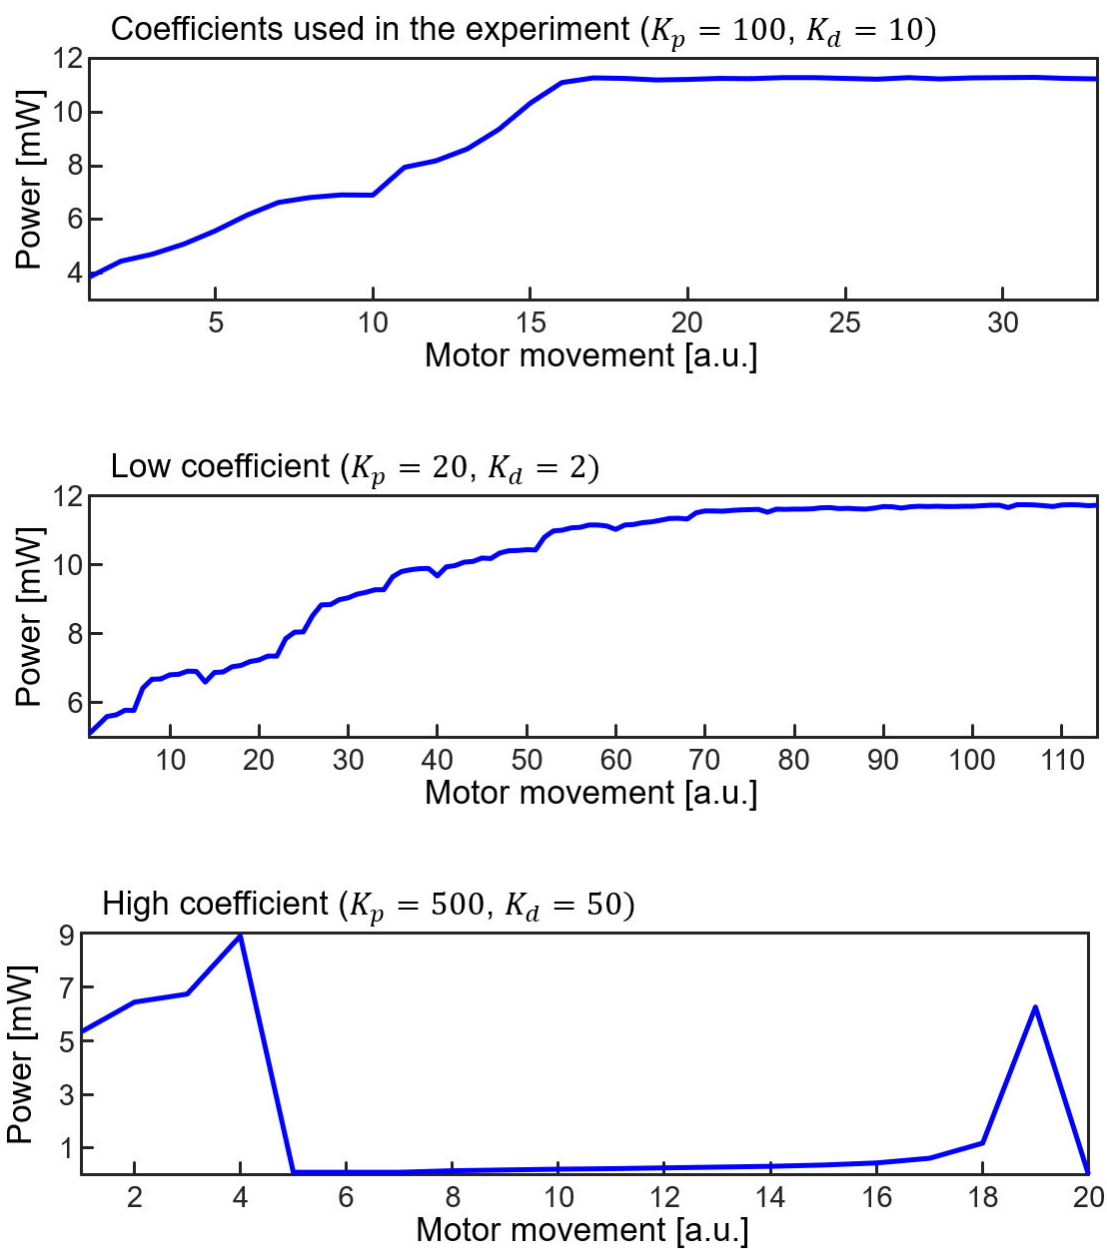

**Figure S2.** Laser power measurement during the automated laser-fiber coupling process with various sets of control coefficients.

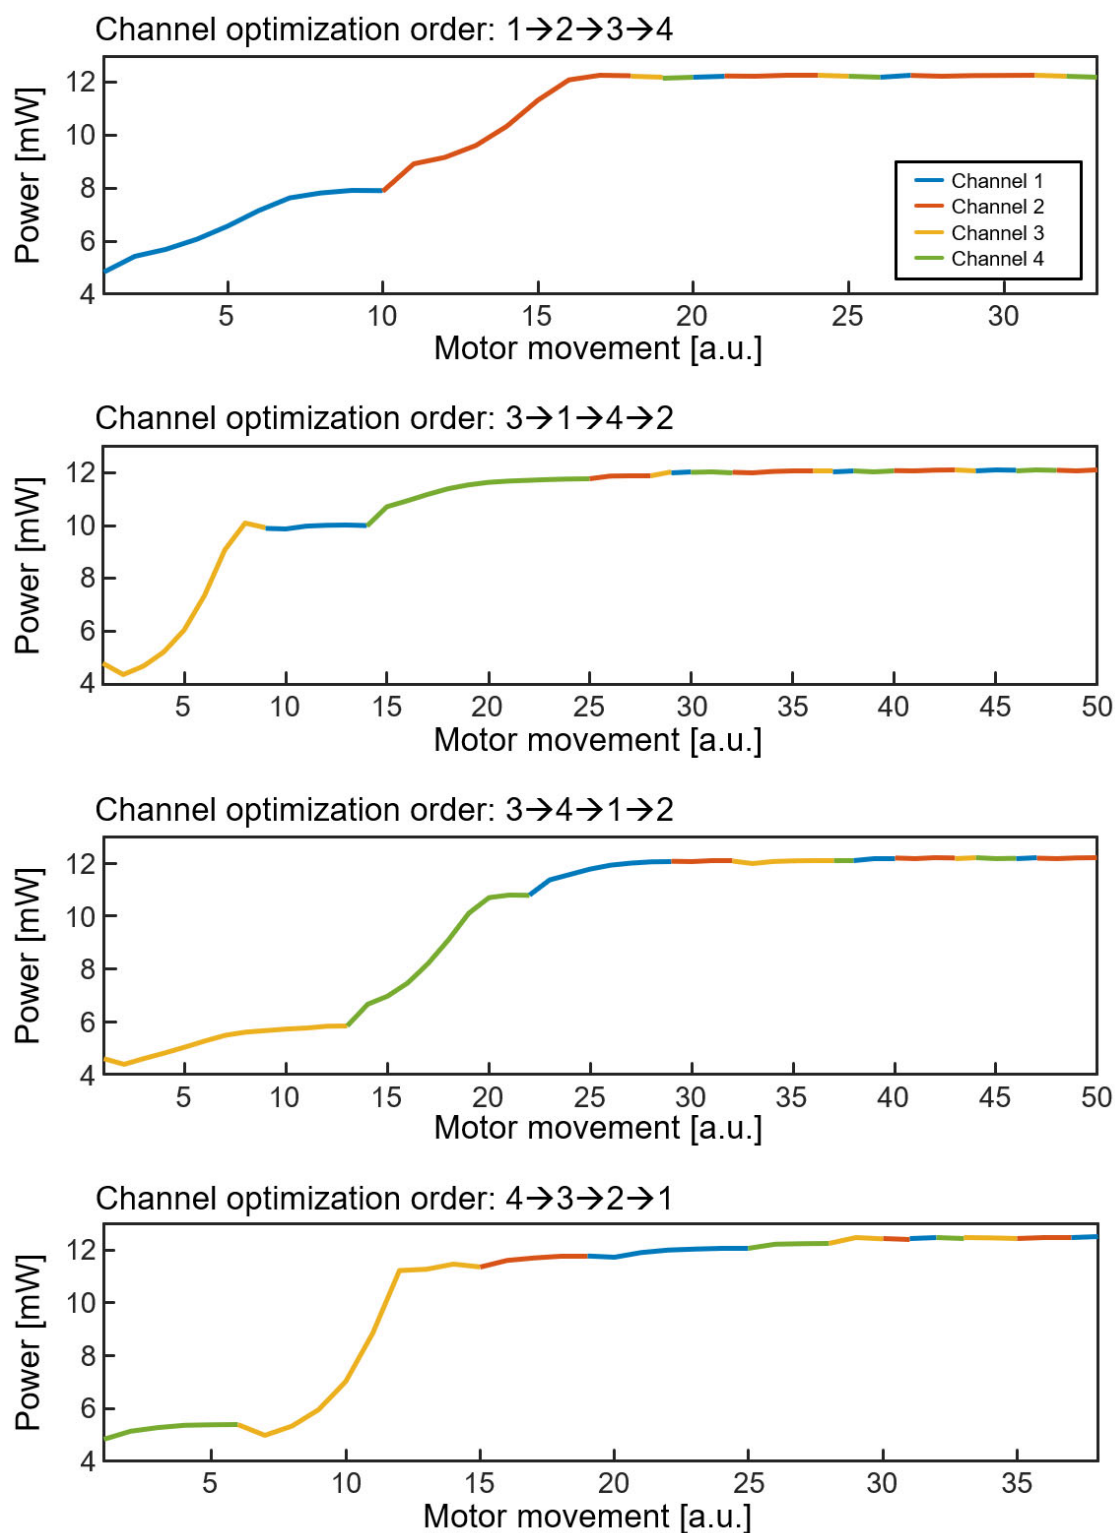

**Figure S3.** Laser power measurement during the automated laser-fiber coupling process with various channel optimization order.
